# Supplementary material for: LiVTeO5: a mid-infrared nonlinear optical vanadium tellurate crystal exhibiting enhanced second harmonic generation activities and notable birefringence
Source: Royal Society of Chemistry journal article supplement (doi:10.1039/d3qi01715j), 2023-01-01
Supplement: d3qi01715j1.pdf [file d3qi01715j1.pdf]

## Electronic Supplementary Information (ESI)

### **LiVTeO<sub>5</sub>: A Mid-Infrared Nonlinear Optical Vanadium Tellurate exhibiting Enhanced Second Harmonic Generation Activities and Notable Birefringence**

Yuheng She,<sup>a</sup> Jinmiao Jiao,<sup>a</sup> Zheng Wang,<sup>b</sup> Jing Chai,<sup>a</sup> Song jie,<sup>a</sup> Ning Ye,<sup>a</sup> Zhanggui  
Hu,<sup>a</sup> Yicheng Wu<sup>a</sup> and Conggang Li\*<sup>a</sup>

*<sup>a</sup>Tianjin Key Laboratory of Functional Crystal Materials, Institute of Functional Crystal,  
Tianjin University of Technology, Tianjin 300384, China.*

*<sup>b</sup>School of Physics and Electronic Engineering, Xingtai University, Xingtai 054001, China.*

**Corresponding Author** E-mail: [cgli@email.tjut.edu.cn](mailto:cgli@email.tjut.edu.cn)

**Table S1.** Atomic coordinates ( $\times 10^4$ ), equivalent isotropic displacement parameters ( $\text{\AA}^2 \times 10^3$ ) for LVTO,  $U_{\text{eq}}$  is defined as one third of the trace of the orthogonalized  $U_{ij}$  tensor, and the bond valence sum for each atom in asymmetric unit.

| Atoms | x        | y       | z       | $U_{\text{eq}}$ | BVS  |
|-------|----------|---------|---------|-----------------|------|
| Li(1) | 9512(18) | 6178(9) | -180(8) | 16(2)           | 0.97 |
| Te(1) | 9504(1)  | 6883(1) | 3498(1) | 8(1)            | 3.80 |
| V(1)  | 4598(1)  | 5222(1) | 1481(1) | 7(1)            | 5.09 |
| O(1)  | 2862(6)  | 6727(4) | 925(3)  | 13(1)           | 1.91 |
| O(2)  | 3125(7)  | 3258(4) | 824(3)  | 17(1)           | 1.92 |
| O(3)  | 3643(7)  | 4916(4) | 3112(3) | 14(1)           | 1.69 |
| O(4)  | 7832(6)  | 6075(4) | 1868(3) | 13(1)           | 2.17 |
| O(5)  | 8427(7)  | 5239(4) | 4663(3) | 13(1)           | 2.46 |

**Table S2.** Selected bond lengths [ $\text{\AA}$ ] and angles ( $^\circ$ ) for LVTO.

|                     |           |                  |            |
|---------------------|-----------|------------------|------------|
| Li(1)-O(1)#3        | 2.108(10) | V(1)-O(1)        | 1.642(3)   |
| Li(1)-O(1)#4        | 2.077(8)  | V(1)-O(2)        | 1.918(3)   |
| Li(1)-O(3)#5        | 2.102(8)  | V(1)-O(3)        | 1.650(3)   |
| Li(1)-O(4)          | 2.142(8)  | V(1)-O(4)        | 1.886(3)   |
| Li(1)-O(5)#5        | 1.956(9)  | V(1)-O(5)#2      | 2.055(3)   |
| Te(1)-O(2)#1        | 1.912(3)  |                  |            |
| Te(1)-O(4)          | 1.906(3)  |                  |            |
| Te(1)-O(5)          | 1.852(3)  |                  |            |
| O(5)#2-Li(1)-O(1)#6 | 98.6(4)   | O(1)-V(1)-O(3)   | 104.48(17) |
| O(5)#2-Li(1)-O(3)#2 | 92.7(4)   | O(1)-V(1)-O(4)   | 106.22(15) |
| O(1)#6-Li(1)-O(3)#2 | 107.2(3)  | O(3)-V(1)-O(4)   | 98.71(16)  |
| O(5)#2-Li(1)-O(1)#8 | 146.6(4)  | O(1)-V(1)-O(2)   | 108.78(16) |
| O(1)#6-Li(1)-O(1)#8 | 109.8(4)  | O(3)-V(1)-O(2)   | 92.88(14)  |
| O(3)#2-Li(1)-O(1)#8 | 95.2(4)   | O(4)-V(1)-O(2)   | 138.87(16) |
| O(5)#2-Li(1)-O(4)   | 73.6(3)   | O(1)-V(1)-O(5)#2 | 98.94(15)  |
| O(1)#6-Li(1)-O(4)   | 99.8(4)   | O(3)-V(1)-O(5)#2 | 156.41(16) |
| O(3)#2-Li(1)-O(4)   | 151.3(4)  | O(4)-V(1)-O(5)#2 | 77.05(13)  |
| O(1)#8-Li(1)-O(4)   | 84.4(3)   | O(2)-V(1)-O(5)#2 | 76.80(13)  |
| O(5)-Te(1)-O(4)     | 94.73(14) |                  |            |
| O(5)-Te(1)-O(2)#1   | 91.13(14) |                  |            |
| O(4)-Te(1)-O(2)#1   | 98.63(14) |                  |            |

Symmetry transformations used to generate equivalent atoms:

|                          |                          |                        |
|--------------------------|--------------------------|------------------------|
| #1 $-x+1, y+1/2, -z+1/2$ | #2 $-x+3/2, -y+1, z-1/2$ | #3 $x-1, y, z$         |
| #4 $x-1/2, -y+3/2, -z$   | #5 $-x+3/2, -y+1, z+1/2$ | #6 $x+1/2, -y+3/2, -z$ |
| #7 $-x+1, y-1/2, -z+1/2$ | #8 $x+1, y, z$           |                        |

**Table S3.** Anisotropic displacement parameters ( $\text{\AA}^2 \times 10^3$ ) for LVTO.

| Atom  | $U_{11}$ | $U_{22}$ | $U_{33}$ | $U_{23}$ | $U_{13}$ | $U_{12}$ |
|-------|----------|----------|----------|----------|----------|----------|
| Li(1) | 20(4)    | 16(3)    | 14(4)    | 2(3)     | 0(3)     | 1(4)     |
| Te(1) | 9(1)     | 8(1)     | 6(1)     | 0(1)     | 1(1)     | 0(1)     |
| V(1)  | 7(1)     | 8(1)     | 6(1)     | -1(1)    | 1(1)     | 0(1)     |
| O(1)  | 9(2)     | 12(1)    | 17(2)    | 2(1)     | 1(1)     | 2(1)     |
| O(2)  | 26(2)    | 14(2)    | 12(2)    | -1(1)    | 5(1)     | -12(2)   |
| O(3)  | 19(2)    | 16(2)    | 8(2)     | 2(1)     | -1(1)    | -2(1)    |
| O(4)  | 10(2)    | 22(2)    | 8(2)     | -3(1)    | 0(1)     | -2(1)    |
| O(5)  | 13(2)    | 13(2)    | 13(2)    | 5(1)     | -2(1)    | -4(1)    |

**Table S4.** The magnitude (Debye) of  $\text{LiO}_5$ ,  $\text{TeO}_3$  and  $\text{VO}_5$  polyhedral dipole moments in LVTO.

| Species | polyhedron     | $X(a)$  | $Y(b)$  | $Z(c)$  | Magnitude Debye |
|---------|----------------|---------|---------|---------|-----------------|
|         | $\text{LiO}_5$ | 2.2380  | 0.0145  | -1.7990 | 2.8714          |
| LVTO    | $\text{TeO}_3$ | -20.606 | -7.4780 | 1.5948  | 21.9794         |
|         | $\text{VO}_5$  | 0.4360  | 0.6360  | 4.3500  | 4.4178          |

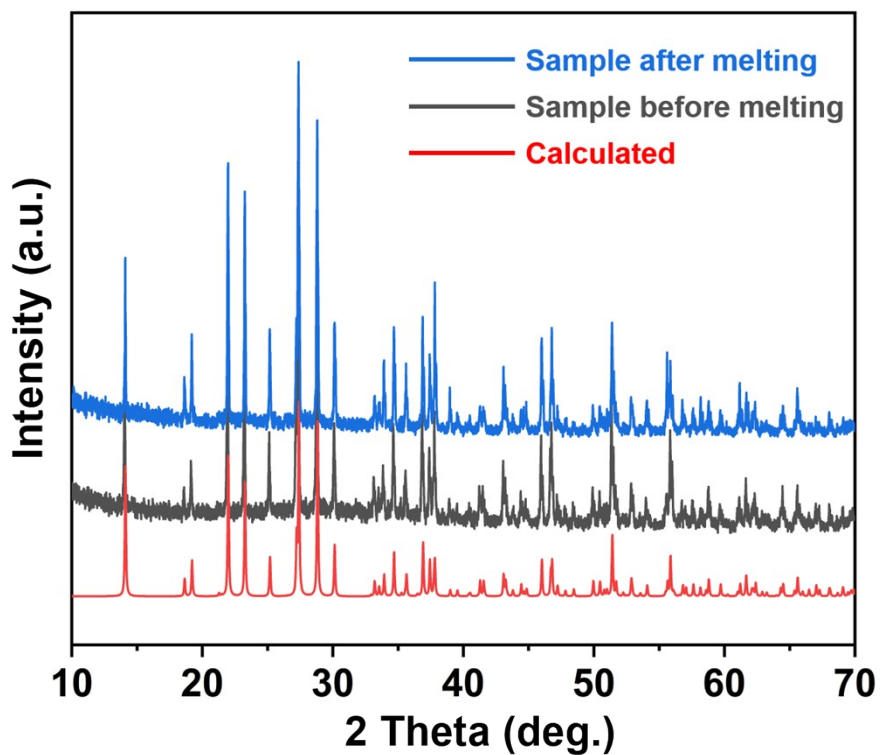

Figure S1. Powder XRD patterns of the initial and melting LVTO samples, respectively.

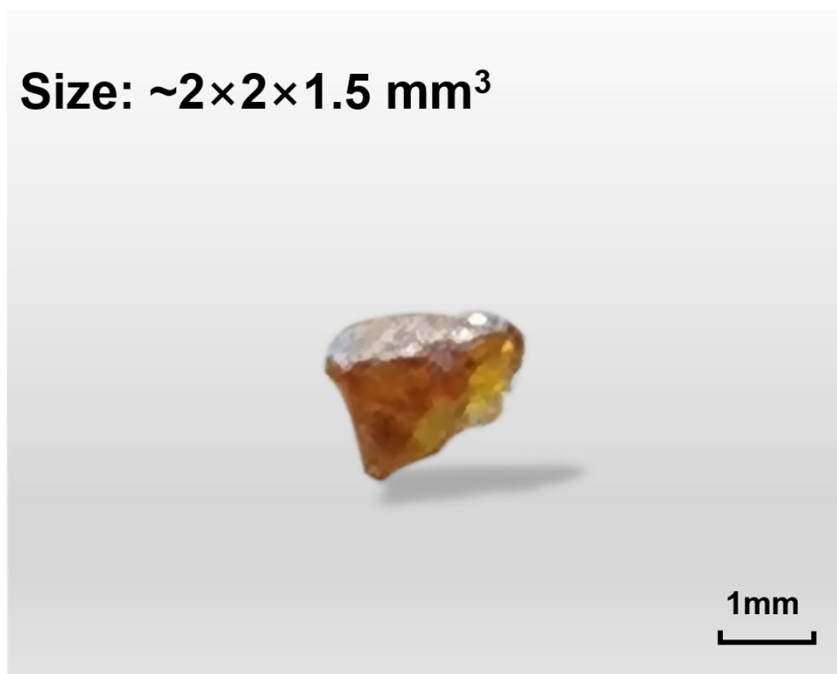

Figure S2. The as-grown single crystal of LVTO.

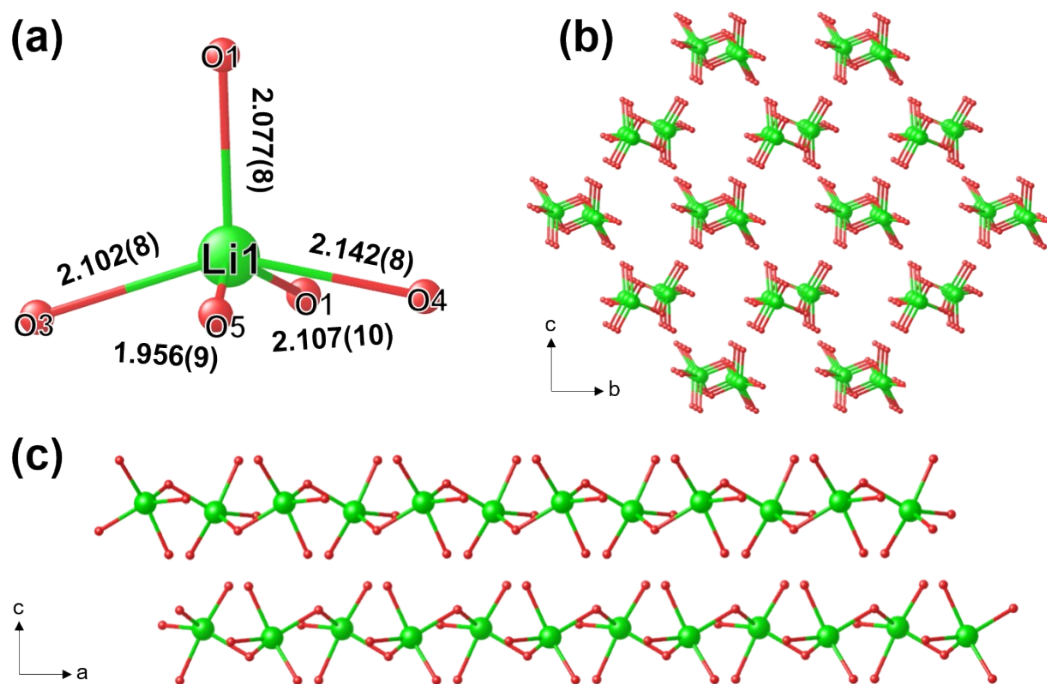

**Figure S3.** (a) The Li-O bond lengths [ $\text{\AA}$ ] for LVTO. (b-c) The connection mode of Li atoms viewed along the  $bc$  and  $ac$  plane, respectively.

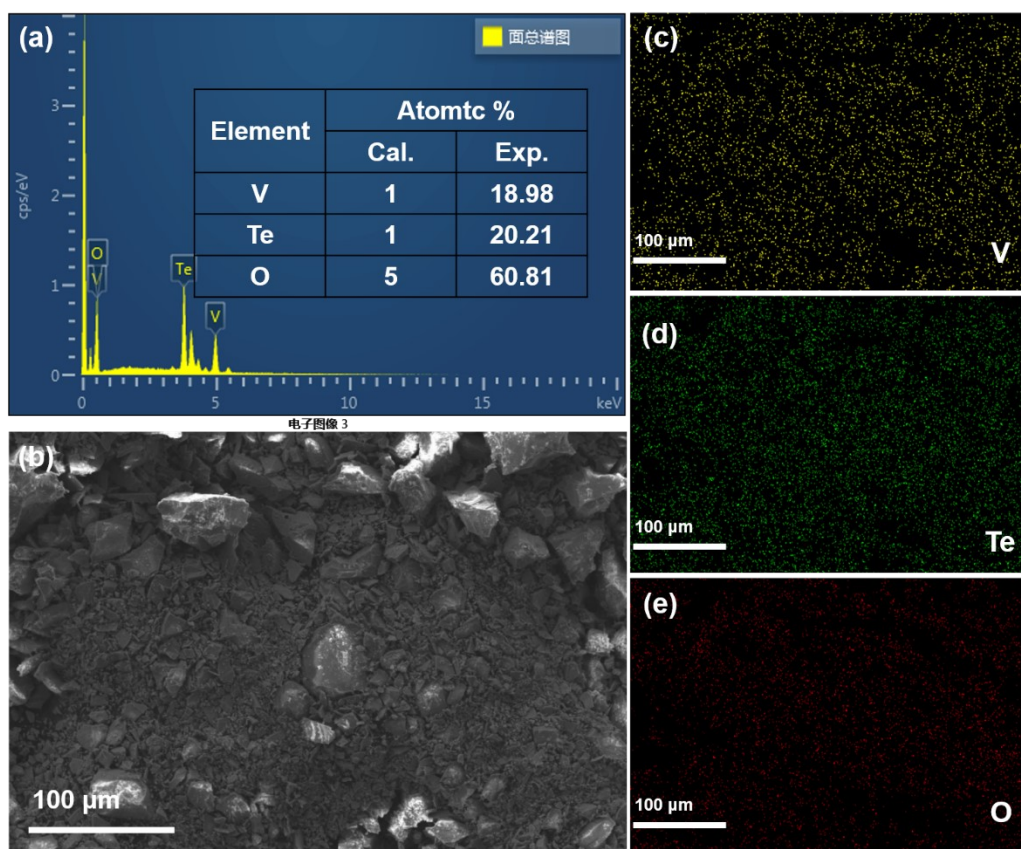

**Figure S4.** (a-e) Energy-dispersive spectroscopy (EDS) analysis of the LVTO crystal.

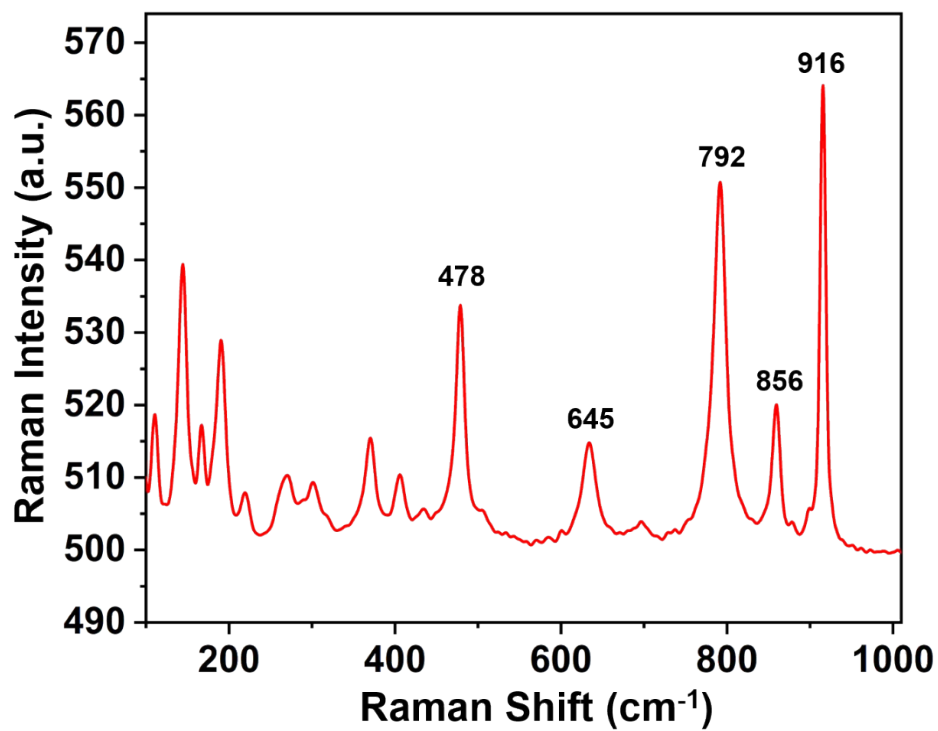

Figure S5. The Raman spectrum of the LVTO crystal.

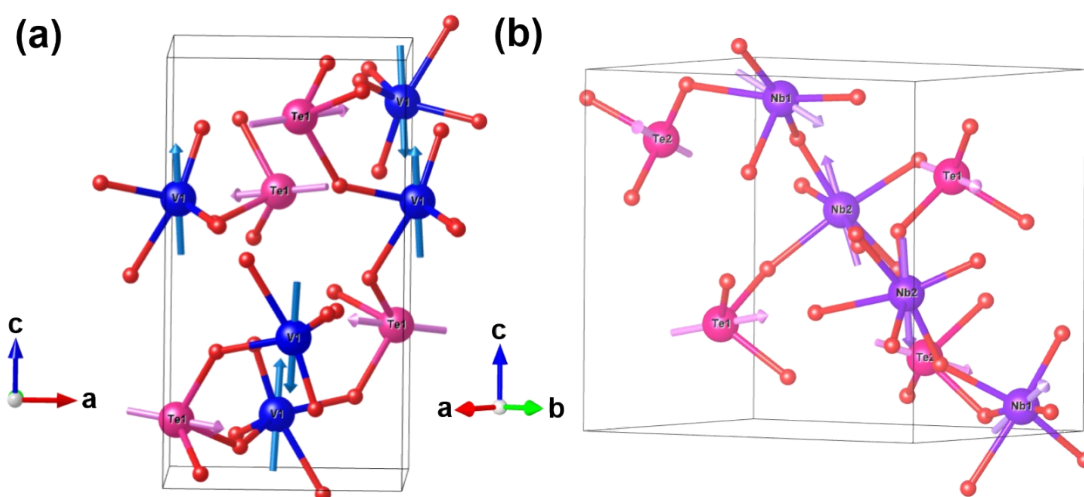

Figure S6. The orientations of the dipole moments of the anionic groups for (a) LVTO and (b)  $\text{LiNbTeO}_5$ .
